# Supplementary material for: Reactivity of vinylidene complexes of ruthenium with hydrazines and hydroxylamines
Source: Royal Society of Chemistry journal article supplement (doi:10.1039/c4dt03464c), 2015-01-01
Supplement: c4dt03464c2.pdf [file c4dt03464c2.pdf]

## **ELECTRONIC SUPPLEMENTARY INFORMATION**

Reactivity of Vinylidene Complexes of Ruthenium with Hydrazines and Hydroxylamines

Gabriele Albertin,\* Stefano Antoniutti, Marco Bortoluzzi, Alessandra Botter

*Dipartimento di Scienze Molecolari e Nanosistemi, Università Ca' Foscari Venezia,*

*Dorsoduro 2137, 30123 Venezia, Italy*

Jesús Castro

*Departamento de Química Inorgánica, Universidade de Vigo, Facultade de Química, Edificio de Ciencias Experimentais, 36310 Vigo (Galicia), Spain*

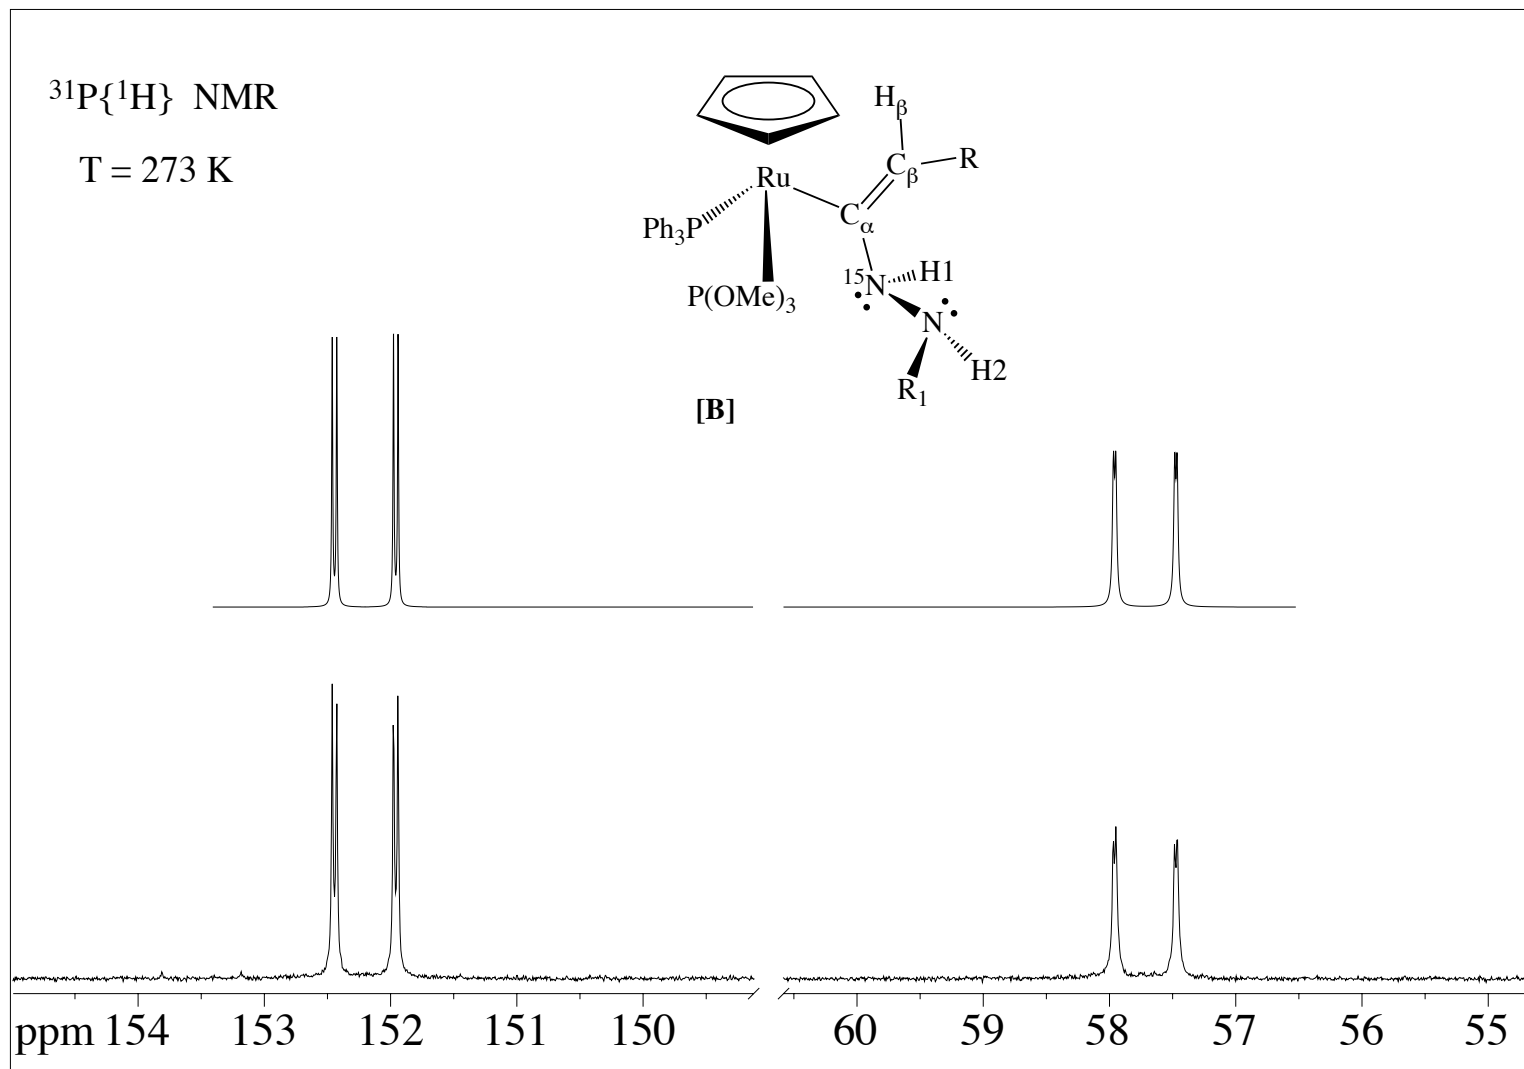

Calculated (upper) and experimental (lower)  $^{31}\text{P}\{^1\text{H}\}$  NMR spectra in  $\text{CD}_2\text{Cl}_2$  of intermediate **[B]**, formed from reaction of **1b** and  $\text{PhNH}^{15}\text{NH}_2$  (ratio 1:2).

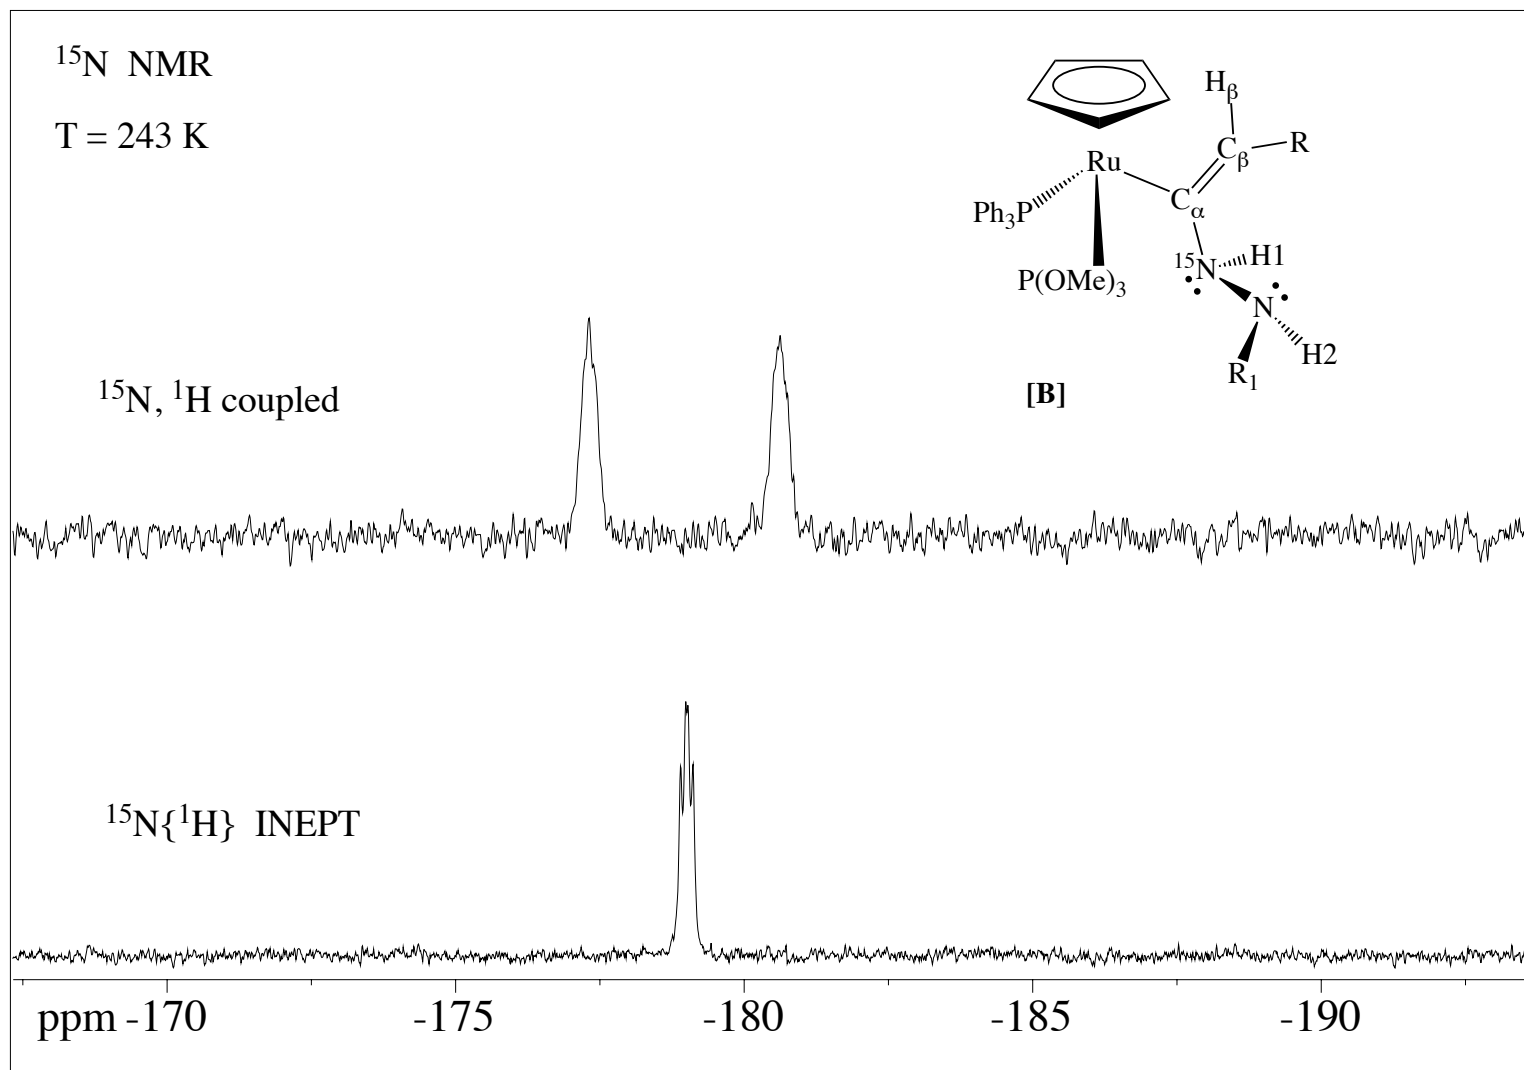

$^{15}\text{N}$  NMR spectra in  $\text{CD}_2\text{Cl}_2$  of intermediate [B].

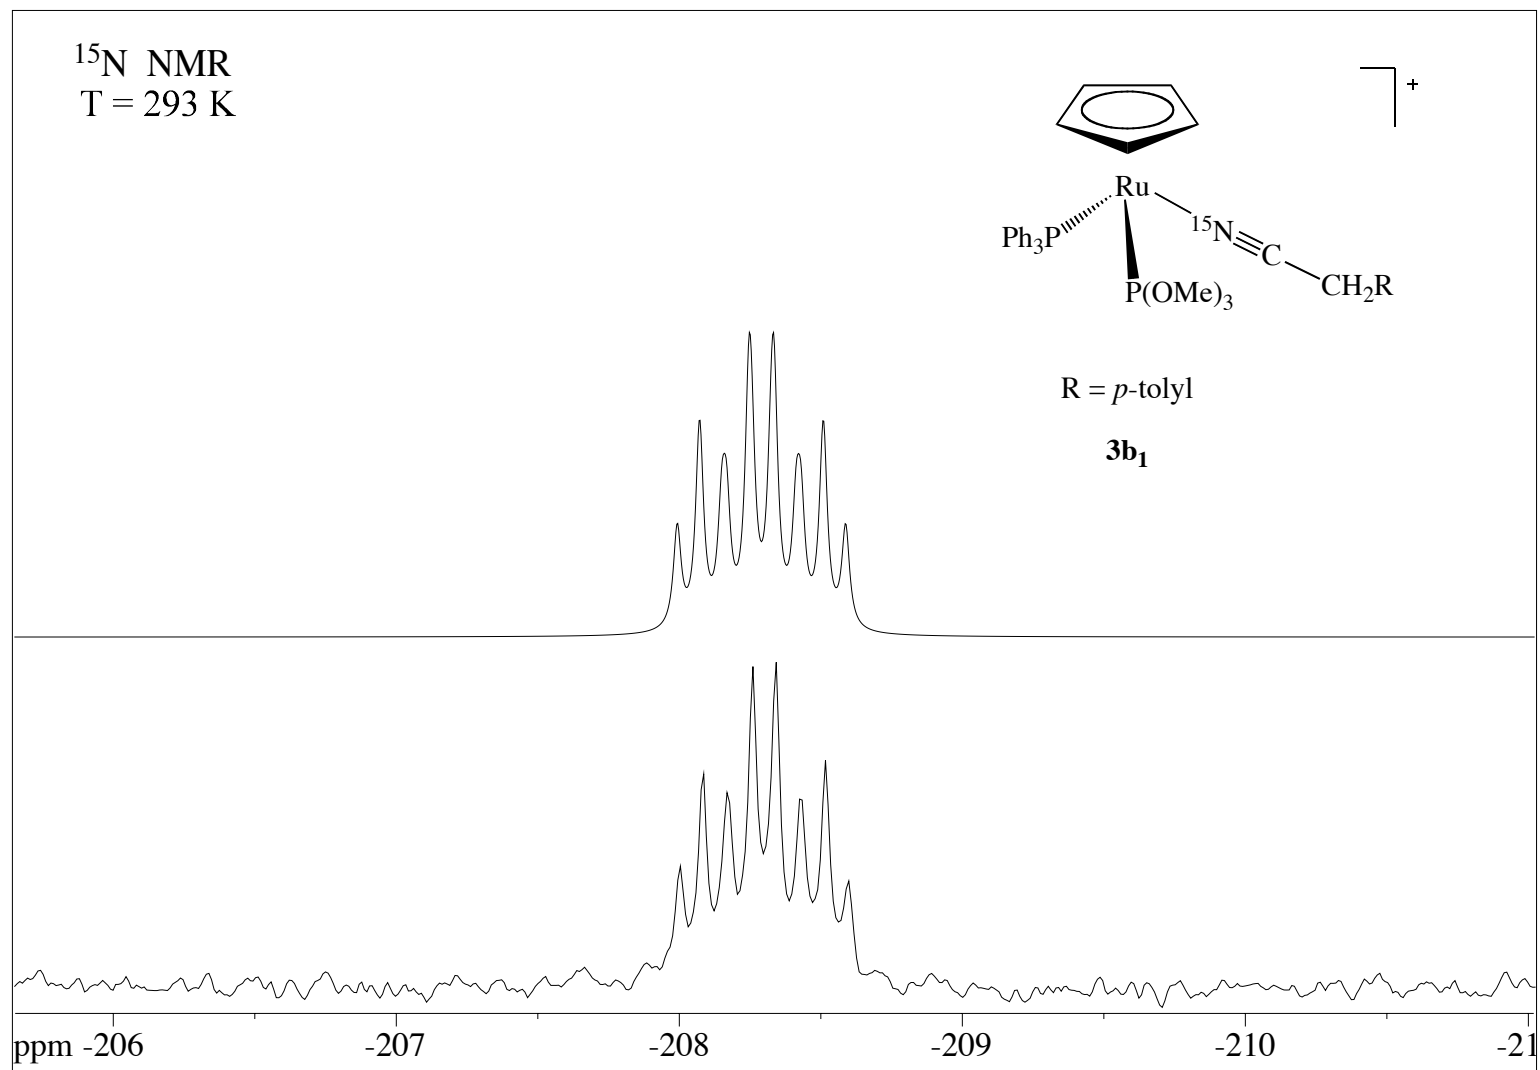

Calculated (upper) and experimental (lower)  $^{15}\text{N}$  NMR spectra in  $\text{CD}_2\text{Cl}_2$  of complex  $[\text{Ru}(\eta^5\text{-C}_5\text{H}_5)(^{15}\text{N}\equiv\text{CCH}_2\text{-}p\text{-tolyl})(\text{PPh}_3)\{\text{P}(\text{OMe})_3\}]\text{BPh}_4$  (**3b<sub>1</sub>**).

Figure S1. Ground-state DFT-optimized geometry of  $[\text{Ru}(\eta^5\text{-C}_5\text{H}_5)\{\text{C}=\text{C}(\text{H})\text{Ph}\}(\text{PH}_3)(\text{PF}_3)]^+$

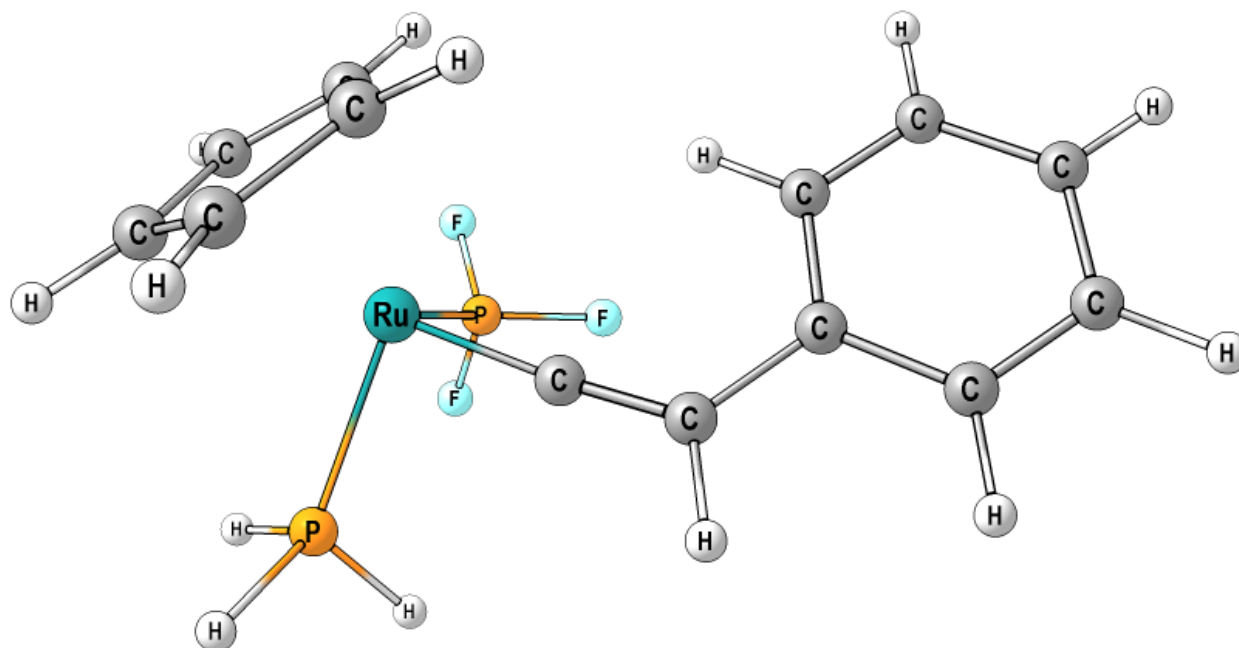

Coordinates (Å)

|    |              |              |              |   |              |              |              |
|----|--------------|--------------|--------------|---|--------------|--------------|--------------|
| Ru | 1.141331000  | -0.421387000 | 0.092930000  | F | -0.463403000 | 2.428246000  | -0.309348000 |
| H  | 1.418134000  | -3.377326000 | 0.510493000  | F | 1.728465000  | 2.813384000  | 0.492510000  |
| C  | 1.564567000  | -2.618159000 | -0.244439000 | C | -0.539642000 | -0.418918000 | 0.918670000  |
| C  | 2.782987000  | -1.910010000 | -0.502024000 | C | -1.751527000 | -0.496216000 | 1.397250000  |
| H  | -0.412708000 | -2.532314000 | -1.278411000 | H | -1.809380000 | -0.719290000 | 2.466445000  |
| H  | 3.704892000  | -2.024866000 | 0.052983000  | C | -3.006405000 | -0.325381000 | 0.657967000  |
| C  | 2.576312000  | -1.034234000 | -1.583051000 | C | -5.425674000 | -0.018892000 | -0.698308000 |
| H  | 3.306741000  | -0.366623000 | -2.017487000 | C | -4.216817000 | -0.373321000 | 1.350521000  |
| C  | 1.213602000  | -1.184025000 | -2.006142000 | C | -3.021977000 | -0.122306000 | -0.725935000 |
| H  | 0.744862000  | -0.663872000 | -2.830657000 | C | -4.223186000 | 0.029704000  | -1.395496000 |
| C  | 0.610236000  | -2.189121000 | -1.201233000 | C | -5.418062000 | -0.220002000 | 0.674631000  |
| P  | 0.945501000  | 1.733931000  | -0.349305000 | H | -4.210908000 | -0.531566000 | 2.425344000  |
| P  | 2.234448000  | 0.040349000  | 2.138062000  | H | -2.085004000 | -0.082774000 | -1.276979000 |
| H  | 2.521472000  | -1.078550000 | 2.936799000  | H | -4.223882000 | 0.185567000  | -2.469624000 |
| H  | 1.582659000  | 0.885713000  | 3.049433000  | H | -6.352856000 | -0.259069000 | 1.224815000  |
| H  | 3.496676000  | 0.651357000  | 2.046625000  | H | -6.366259000 | 0.099191000  | -1.226537000 |
| F  | 1.390637000  | 2.205766000  | -1.781829000 |   |              |              |              |

Figure S2. Ground-state DFT-optimized geometry of  $[\text{Ru}(\eta^5\text{-C}_5\text{H}_5)\{\text{C}(\text{NH}_2\text{NH}_2)=\text{C}(\text{H})\text{Ph}\}(\text{PH}_3)(\text{PF}_3)]^+$

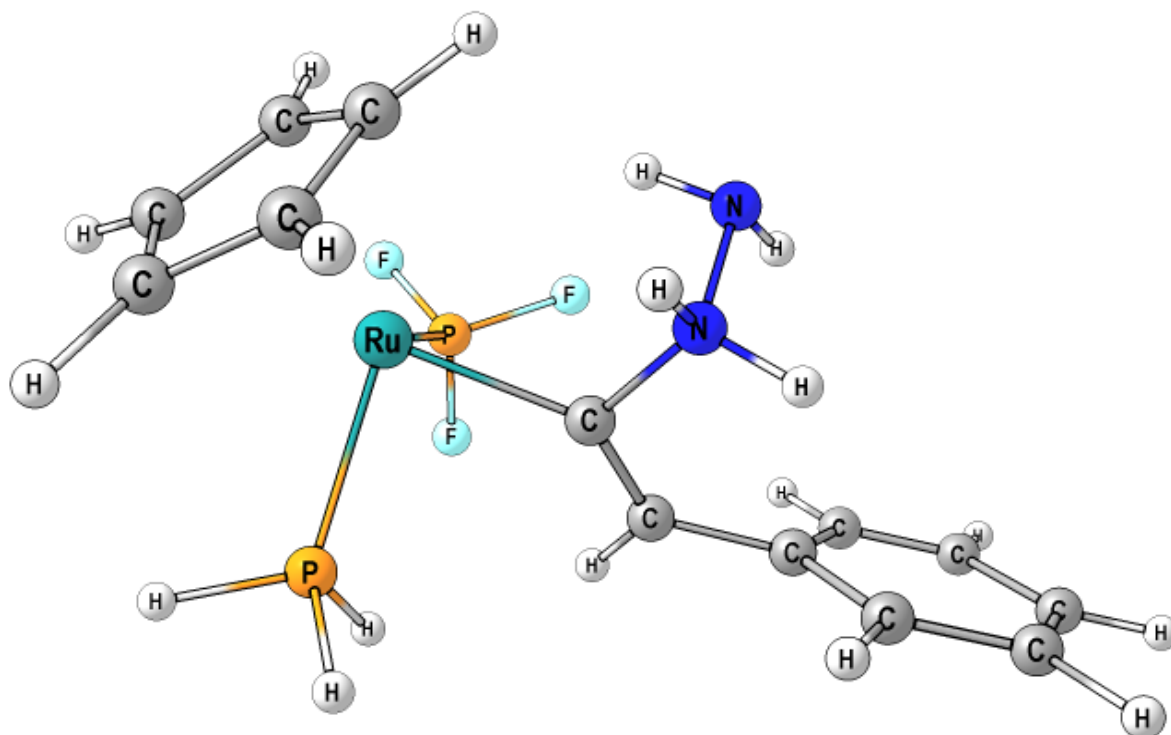

Coordinates (Å)

|    |              |              |              |   |              |              |              |
|----|--------------|--------------|--------------|---|--------------|--------------|--------------|
| Ru | 1.421074000  | -0.341257000 | 0.142440000  | C | -1.685016000 | 0.083361000  | 0.710980000  |
| H  | 3.263070000  | -2.277724000 | 1.484228000  | H | -1.423224000 | 0.818644000  | 1.471781000  |
| C  | 3.041516000  | -1.877426000 | 0.503158000  | C | -3.134305000 | -0.050357000 | 0.448992000  |
| C  | 3.640792000  | -0.727741000 | -0.077572000 | C | -5.868835000 | -0.230213000 | -0.098787000 |
| H  | 1.538077000  | -3.331260000 | -0.265942000 | C | -3.814871000 | -1.259170000 | 0.616018000  |
| H  | 4.406249000  | -0.109856000 | 0.368535000  | C | -3.848664000 | 1.071078000  | 0.018685000  |
| C  | 3.064394000  | -0.559814000 | -1.366732000 | C | -5.204023000 | 0.981061000  | -0.253582000 |
| H  | 3.313856000  | 0.220879000  | -2.073072000 | C | -5.173439000 | -1.347929000 | 0.337098000  |
| C  | 2.123937000  | -1.605602000 | -1.585386000 | H | -3.281743000 | -2.127708000 | 0.997731000  |
| H  | 1.596124000  | -1.796738000 | -2.510673000 | H | -3.325779000 | 2.016475000  | -0.105429000 |
| C  | 2.107701000  | -2.424131000 | -0.415412000 | H | -5.745959000 | 1.858921000  | -0.590737000 |
| P  | 1.094612000  | 1.782544000  | -0.222245000 | H | -5.689358000 | -2.293024000 | 0.473351000  |
| P  | 1.116613000  | -0.195658000 | 2.455919000  | H | -6.930348000 | -0.299333000 | -0.313057000 |
| H  | 0.389948000  | -1.234818000 | 3.071359000  | N | -1.174251000 | -1.387235000 | -1.079729000 |
| H  | 0.462592000  | 0.912590000  | 3.029001000  | H | -2.163006000 | -1.647002000 | -0.946743000 |
| H  | 2.282646000  | -0.212252000 | 3.246799000  | H | -0.652736000 | -2.265551000 | -1.111907000 |
| F  | 2.298585000  | 2.651188000  | -0.772108000 | N | -1.082366000 | -0.781003000 | -2.384199000 |
| F  | 0.022160000  | 2.265102000  | -1.293142000 | H | -0.147245000 | -0.368945000 | -2.416459000 |
| F  | 0.628238000  | 2.785581000  | 0.917928000  | H | -1.731516000 | 0.006992000  | -2.362884000 |
| C  | -0.682825000 | -0.519357000 | 0.055045000  |   |              |              |              |

Figure S3. Ground-state DFT-optimized geometry of  $[\text{Ru}(\eta^5\text{-C}_5\text{H}_5)\{\text{C}(\text{NHNH}_3)=\text{C}(\text{H})\text{Ph}\}-(\text{PH}_3)(\text{PF}_3)]^+$

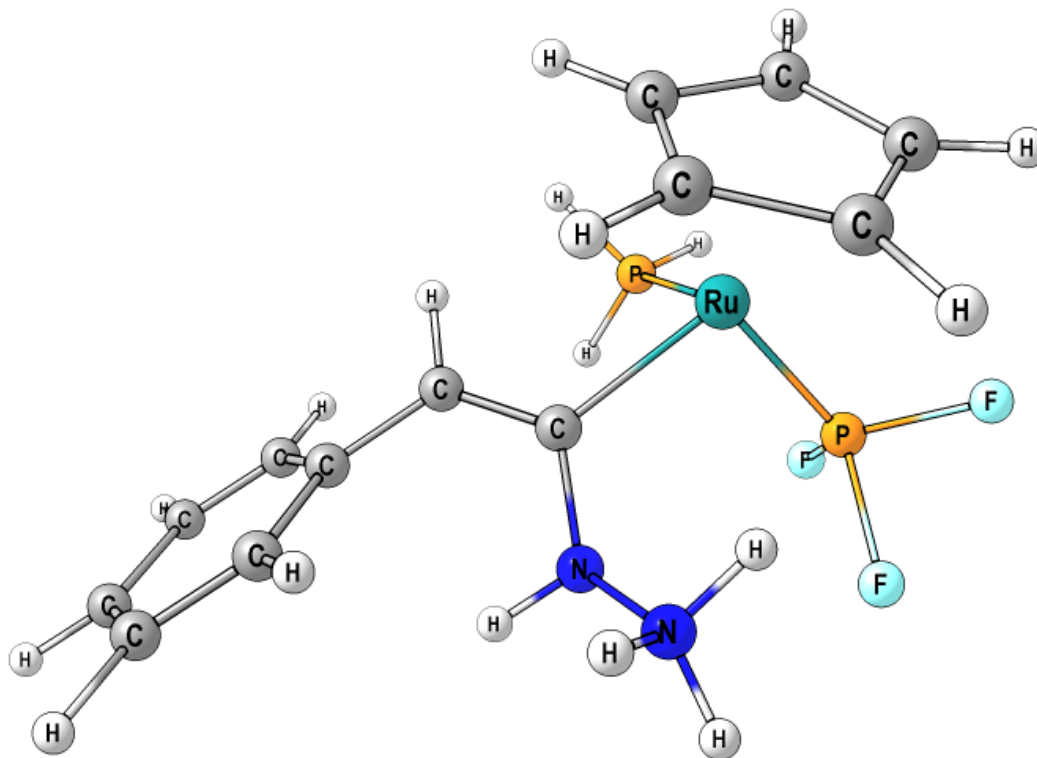

Coordinates (Å)

|    |              |              |              |   |              |              |              |
|----|--------------|--------------|--------------|---|--------------|--------------|--------------|
| Ru | 1.191388000  | -0.518108000 | 0.037821000  | N | -1.105709000 | 1.339809000  | -0.798027000 |
| H  | 0.348030000  | -3.351422000 | 0.234343000  | H | -2.101814000 | 1.536372000  | -0.911833000 |
| C  | 1.052248000  | -2.719751000 | -0.290283000 | C | -1.871961000 | -0.573090000 | 0.378656000  |
| C  | 2.396964000  | -2.421617000 | 0.123023000  | H | -1.662866000 | -1.415194000 | 1.038225000  |
| H  | -0.079247000 | -2.125252000 | -2.117089000 | C | -3.305880000 | -0.263610000 | 0.206653000  |
| H  | 2.877024000  | -2.777737000 | 1.024184000  | C | -6.042295000 | 0.288769000  | -0.064676000 |
| C  | 2.978744000  | -1.592284000 | -0.854239000 | C | -3.887417000 | -0.112212000 | -1.056492000 |
| H  | 3.980728000  | -1.186192000 | -0.832558000 | C | -4.131555000 | -0.155065000 | 1.329522000  |
| C  | 2.009042000  | -1.374202000 | -1.890237000 | C | -5.483792000 | 0.119343000  | 1.196211000  |
| H  | 2.174904000  | -0.825825000 | -2.807752000 | C | -5.240226000 | 0.168261000  | -1.190944000 |
| C  | 0.839186000  | -2.095750000 | -1.545776000 | H | -3.280052000 | -0.258803000 | -1.947634000 |
| P  | 2.066009000  | 1.468760000  | 0.186543000  | H | -3.696159000 | -0.283831000 | 2.317665000  |
| P  | 0.716846000  | -0.491217000 | 2.319421000  | H | -6.106495000 | 0.202678000  | 2.081668000  |
| H  | 0.141980000  | -1.674831000 | 2.827855000  | H | -5.672010000 | 0.277085000  | -2.181099000 |
| H  | -0.200595000 | 0.456024000  | 2.814614000  | H | -7.101115000 | 0.503265000  | -0.168706000 |
| H  | 1.764690000  | -0.327013000 | 3.248488000  | N | -0.498572000 | 1.412266000  | -2.089858000 |
| F  | 1.733061000  | 2.661403000  | -0.838559000 | H | -0.406916000 | 2.386492000  | -2.391569000 |
| F  | 1.924124000  | 2.360651000  | 1.497090000  | H | -0.979313000 | 0.868945000  | -2.820065000 |
| F  | 3.642149000  | 1.604770000  | 0.041776000  | H | 0.451128000  | 1.009357000  | -1.968311000 |
| C  | -0.826364000 | 0.100130000  | -0.138349000 |   |              |              |              |

Figure S4. Ground-state DFT-optimized geometry of  $[\text{Ru}(\eta^5\text{-C}_5\text{H}_5)\{\text{C}(\text{NHNH}_2)=\text{C}(\text{H})\text{Ph}\}(\text{PH}_3)(\text{PF}_3)]$

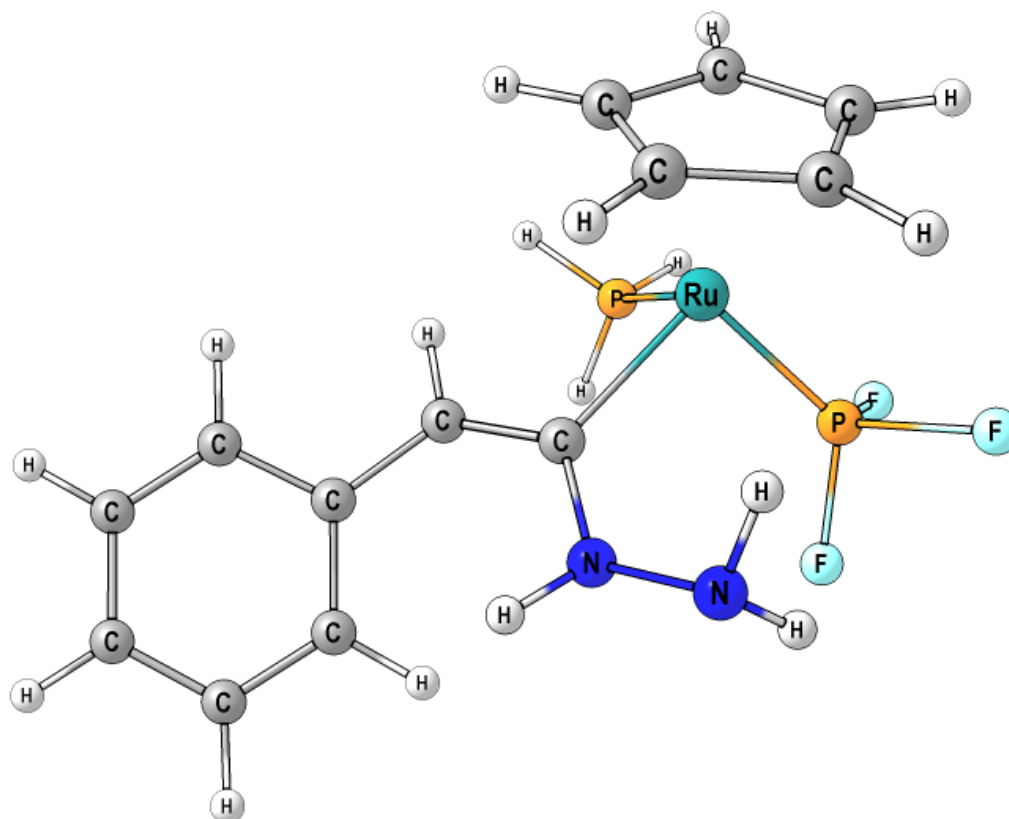

Coordinates (Å)

|    |              |              |              |   |              |              |              |
|----|--------------|--------------|--------------|---|--------------|--------------|--------------|
| Ru | 1.257494000  | 0.308773000  | 0.009377000  | C | -0.791530000 | -0.170882000 | 0.301508000  |
| H  | 0.552516000  | 3.181324000  | 0.147712000  | C | -1.756848000 | 0.559497000  | -0.338644000 |
| C  | 1.265922000  | 2.473374000  | 0.547213000  | H | -1.418993000 | 1.390725000  | -0.954603000 |
| C  | 2.553139000  | 2.160305000  | -0.008463000 | C | -3.211043000 | 0.466684000  | -0.253317000 |
| H  | 0.267060000  | 1.749836000  | 2.408484000  | C | -6.043498000 | 0.436386000  | -0.186102000 |
| H  | 2.969642000  | 2.579688000  | -0.914563000 | C | -3.974381000 | 1.604231000  | -0.578149000 |
| C  | 3.177555000  | 1.218074000  | 0.831398000  | C | -3.928083000 | -0.697513000 | 0.077811000  |
| H  | 4.156995000  | 0.782945000  | 0.688533000  | C | -5.316394000 | -0.706011000 | 0.113758000  |
| C  | 2.287341000  | 0.939370000  | 1.921044000  | C | -5.356463000 | 1.593495000  | -0.542510000 |
| H  | 2.494213000  | 0.274583000  | 2.749394000  | H | -3.450968000 | 2.515501000  | -0.860989000 |
| C  | 1.128831000  | 1.736463000  | 1.754247000  | H | -3.398397000 | -1.626715000 | 0.263090000  |
| P  | 1.906196000  | -1.744569000 | -0.211121000 | H | -5.834255000 | -1.626769000 | 0.368789000  |
| P  | 0.758006000  | 0.422529000  | -2.252962000 | H | -5.906953000 | 2.495726000  | -0.795059000 |
| H  | 0.240182000  | 1.653021000  | -2.712265000 | H | -7.128480000 | 0.425961000  | -0.154115000 |
| H  | -0.191971000 | -0.451158000 | -2.819920000 | N | -1.172814000 | -1.139819000 | 1.217518000  |
| H  | 1.810031000  | 0.266381000  | -3.182284000 | H | -2.105669000 | -1.003939000 | 1.595186000  |
| F  | 2.963079000  | -2.309204000 | 0.842414000  | N | -0.331417000 | -1.644534000 | 2.225718000  |
| F  | 0.961099000  | -3.037550000 | -0.196010000 | H | 0.397323000  | -0.967806000 | 2.441188000  |
| F  | 2.710022000  | -2.204276000 | -1.515438000 | H | 0.121511000  | -2.489129000 | 1.889132000  |



Figure S5. Transition-state DFT-optimized geometry of  $[\text{Ru}(\eta^5\text{-C}_5\text{H}_5)\{\text{C}(\text{NH}\cdots\text{NH}_3)=\text{C}(\text{H})\text{Ph}\}(\text{PH}_3)(\text{PF}_3)]^+$

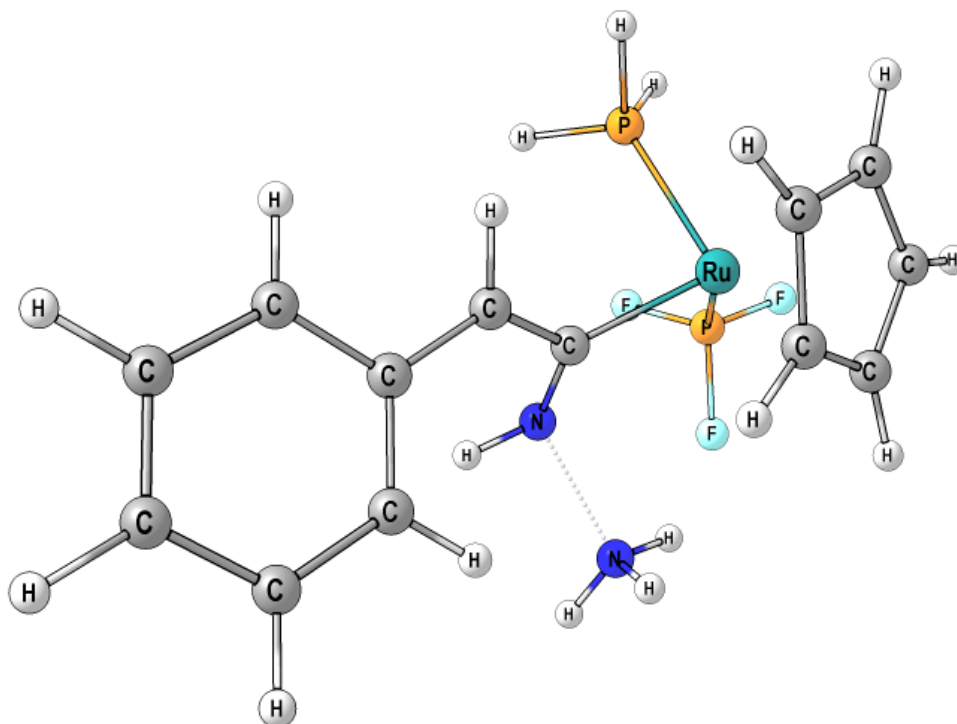

Coordinates (Å)

|    |              |              |              |   |              |              |              |
|----|--------------|--------------|--------------|---|--------------|--------------|--------------|
| Ru | 1.134984000  | -0.576014000 | -0.083995000 | N | -0.853844000 | 1.673713000  | 0.275906000  |
| H  | -0.182706000 | -3.168490000 | -0.748871000 | H | -1.838347000 | 1.951999000  | 0.377646000  |
| C  | 0.554773000  | -2.472874000 | -1.126429000 | C | -1.831574000 | -0.416050000 | 0.575128000  |
| C  | 1.971394000  | -2.528628000 | -0.889454000 | H | -1.653742000 | -1.340632000 | 1.128804000  |
| H  | -0.656594000 | -1.097192000 | -2.400908000 | C | -3.227789000 | -0.152297000 | 0.327016000  |
| H  | 2.478838000  | -3.252263000 | -0.265936000 | C | -5.964433000 | 0.216653000  | -0.103100000 |
| C  | 2.578781000  | -1.480967000 | -1.603017000 | C | -3.685818000 | 0.655644000  | -0.728917000 |
| H  | 3.634685000  | -1.249118000 | -1.624737000 | C | -4.178113000 | -0.796400000 | 1.137346000  |
| C  | 1.545860000  | -0.759688000 | -2.294860000 | C | -5.531199000 | -0.601756000 | 0.933210000  |
| H  | 1.693469000  | 0.089964000  | -2.948074000 | C | -5.038828000 | 0.833513000  | -0.940100000 |
| C  | 0.313011000  | -1.400403000 | -2.025858000 | H | -2.976626000 | 1.111041000  | -1.411380000 |
| P  | 2.193864000  | 1.244777000  | 0.431799000  | H | -3.834082000 | -1.443741000 | 1.939013000  |
| P  | 1.112883000  | -1.261816000 | 2.136501000  | H | -6.252653000 | -1.094495000 | 1.576053000  |
| H  | 0.770592000  | -2.614435000 | 2.349073000  | H | -5.379497000 | 1.447893000  | -1.766581000 |
| H  | 0.214372000  | -0.653798000 | 3.041166000  | H | -7.026465000 | 0.363452000  | -0.270094000 |
| H  | 2.285977000  | -1.207339000 | 2.917209000  | N | -0.657735000 | 2.487163000  | -1.537770000 |
| F  | 2.074134000  | 2.570799000  | -0.464037000 | H | -1.182971000 | 3.356877000  | -1.560497000 |
| F  | 1.993877000  | 1.972842000  | 1.831544000  | H | -0.918835000 | 1.887603000  | -2.316914000 |
| F  | 3.783924000  | 1.249293000  | 0.451637000  | H | 0.340958000  | 2.676615000  | -1.549218000 |
| C  | -0.696605000 | 0.332205000  | 0.266743000  |   |              |              |              |

Figure S6. Ground-state DFT-optimized geometry of  $[\text{Ru}(\eta^5\text{-C}_5\text{H}_5)\{\eta^2\text{-(C,C)NH=C=C(H)Ph}\}\text{(PH}_3\text{)}(\text{PF}_3)]^+$

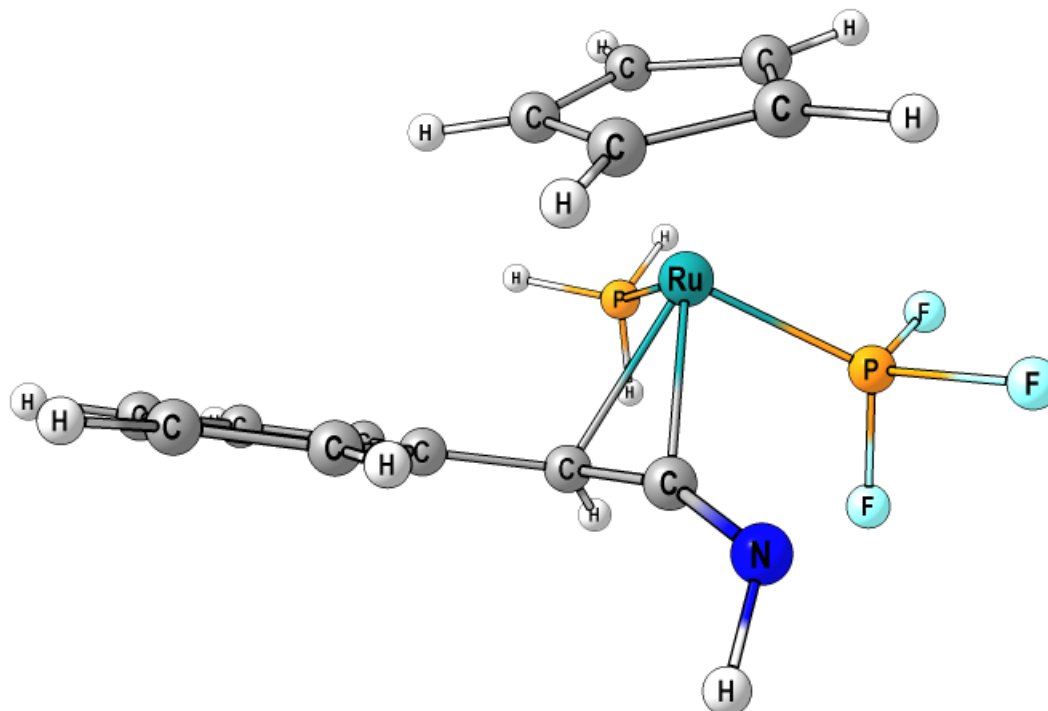

Coordinates (Å)

|    |              |              |              |   |              |              |              |
|----|--------------|--------------|--------------|---|--------------|--------------|--------------|
| Ru | 0.549043000  | 0.389342000  | -0.179006000 | F | 3.549138000  | -0.767239000 | -0.863724000 |
| H  | -1.840493000 | 2.100827000  | -0.703145000 | C | -0.134709000 | -0.787264000 | 1.525433000  |
| C  | -0.803500000 | 2.176618000  | -0.403325000 | N | 0.269314000  | -0.699897000 | 2.686914000  |
| C  | 0.312315000  | 2.363218000  | -1.271210000 | H | -0.230806000 | -1.320037000 | 3.333360000  |
| H  | -0.896649000 | 2.032366000  | 1.827865000  | C | -0.917629000 | -1.214254000 | 0.462920000  |
| H  | 0.268776000  | 2.435478000  | -2.350105000 | H | -0.623782000 | -2.173600000 | 0.035084000  |
| C  | 1.490012000  | 2.412530000  | -0.488317000 | C | -2.339632000 | -0.844192000 | 0.320265000  |
| H  | 2.495977000  | 2.550356000  | -0.859299000 | C | -5.027822000 | -0.157563000 | -0.018688000 |
| C  | 1.105394000  | 2.270921000  | 0.884225000  | C | -2.998031000 | -0.059746000 | 1.270204000  |
| H  | 1.769292000  | 2.284379000  | 1.737925000  | C | -3.059110000 | -1.308007000 | -0.782782000 |
| C  | -0.306792000 | 2.148107000  | 0.929286000  | C | -4.391472000 | -0.964601000 | -0.952237000 |
| P  | 2.388600000  | -0.762968000 | 0.199731000  | C | -4.328973000 | 0.283902000  | 1.097894000  |
| P  | 0.263534000  | -0.697625000 | -2.253746000 | H | -2.469385000 | 0.275848000  | 2.158464000  |
| H  | -0.981969000 | -0.459708000 | -2.865693000 | H | -2.577731000 | -1.961980000 | -1.505689000 |
| H  | 0.325485000  | -2.103399000 | -2.303048000 | H | -4.936362000 | -1.333867000 | -1.815007000 |
| H  | 1.146476000  | -0.351873000 | -3.292972000 | H | -4.826481000 | 0.893746000  | 1.845097000  |
| F  | 3.250786000  | -0.383073000 | 1.456487000  | H | -6.069704000 | 0.114395000  | -0.152104000 |
| F  | 2.313629000  | -2.319002000 | 0.445611000  |   |              |              |              |

Figure S7. Ground-state DFT-optimized geometry of  $[\text{Ru}(\eta^5\text{-C}_5\text{H}_5)\{\eta^1\text{-NH}=\text{C}=\text{C}(\text{H})\text{Ph}\}(\text{PH}_3)(\text{PF}_3)]^+$

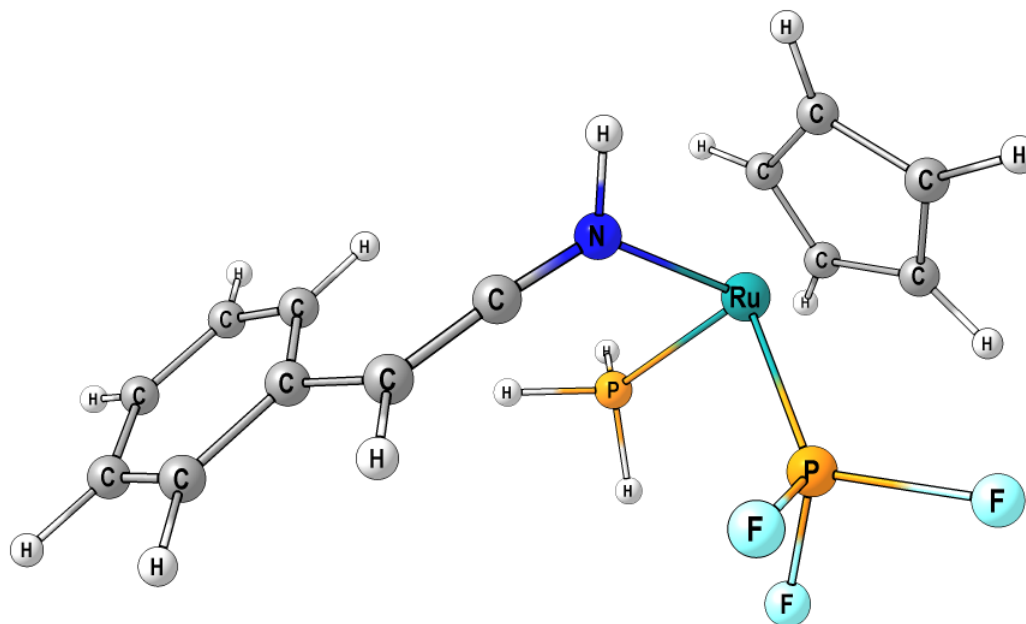

Coordinates (Å)

|    |              |              |              |   |              |              |              |
|----|--------------|--------------|--------------|---|--------------|--------------|--------------|
| Ru | 1.427017000  | -0.468248000 | -0.063724000 | F | 1.215687000  | 2.403364000  | 1.596448000  |
| H  | 1.629745000  | -3.437650000 | -0.029559000 | C | -1.316001000 | 0.279835000  | -1.336422000 |
| C  | 2.223497000  | -2.543454000 | -0.154630000 | N | -0.230169000 | -0.293654000 | -1.456498000 |
| C  | 2.886379000  | -1.810518000 | 0.884093000  | C | -2.432840000 | 0.909188000  | -1.108957000 |
| H  | 2.160069000  | -2.201549000 | -2.357572000 | H | -2.440447000 | 1.970063000  | -1.357188000 |
| H  | 2.875967000  | -2.047393000 | 1.939146000  | C | -3.654498000 | 0.307731000  | -0.569271000 |
| C  | 3.582482000  | -0.730466000 | 0.285021000  | C | -5.999317000 | -0.767441000 | 0.492481000  |
| H  | 4.191022000  | -0.003378000 | 0.804823000  | C | -3.756266000 | -1.065250000 | -0.324301000 |
| C  | 3.364116000  | -0.787274000 | -1.131286000 | C | -4.743810000 | 1.130892000  | -0.284588000 |
| H  | 3.776809000  | -0.113626000 | -1.868662000 | C | -5.908751000 | 0.594511000  | 0.243841000  |
| C  | 2.534943000  | -1.906144000 | -1.385744000 | C | -4.919468000 | -1.595671000 | 0.204998000  |
| P  | 1.503052000  | 1.720360000  | 0.196764000  | H | -2.922967000 | -1.722580000 | -0.562713000 |
| P  | -0.107249000 | -0.771639000 | 1.696281000  | H | -4.672476000 | 2.197458000  | -0.478278000 |
| H  | -0.024809000 | -2.010359000 | 2.360913000  | H | -6.749371000 | 1.245241000  | 0.461665000  |
| H  | -1.488662000 | -0.739952000 | 1.402138000  | H | -4.988627000 | -2.662839000 | 0.389618000  |
| H  | -0.078959000 | 0.099306000  | 2.801717000  | H | -6.911163000 | -1.186591000 | 0.905219000  |
| F  | 2.893842000  | 2.419856000  | -0.074946000 | H | -0.060906000 | -0.733255000 | -2.365277000 |
| F  | 0.604625000  | 2.696687000  | -0.669698000 |   |              |              |              |

Figure S8. Ground-state DFT-optimized geometry of  $[\text{Ru}(\eta^5\text{-C}_5\text{H}_5)\{\text{N}=\text{CCH}_2\text{Ph}\}(\text{PH}_3)(\text{PF}_3)]^+$

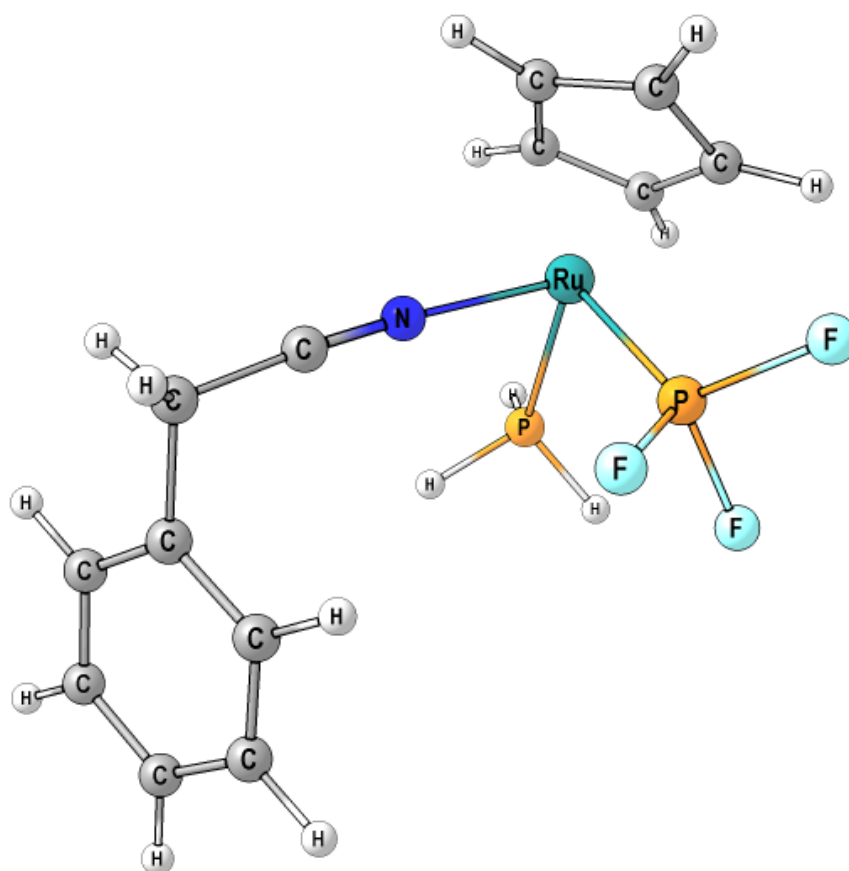

Coordinates (Å)

|    |              |              |              |   |              |              |              |
|----|--------------|--------------|--------------|---|--------------|--------------|--------------|
| Ru | 1.487322000  | -0.415346000 | 0.090041000  | F | 2.339168000  | 2.561574000  | -0.886415000 |
| H  | 2.230384000  | -3.214031000 | 0.758639000  | N | -0.337285000 | -0.833289000 | -0.821599000 |
| C  | 2.625319000  | -2.307306000 | 0.323106000  | C | -1.375538000 | -1.017041000 | -1.276810000 |
| C  | 3.296843000  | -1.251479000 | 1.021293000  | C | -2.720418000 | -1.186086000 | -1.784844000 |
| H  | 2.156584000  | -2.543876000 | -1.845538000 | H | -2.901864000 | -2.253711000 | -1.944291000 |
| H  | 3.487778000  | -1.210306000 | 2.084997000  | H | -2.775627000 | -0.701917000 | -2.767757000 |
| C  | 3.682687000  | -0.271514000 | 0.073015000  | C | -3.724210000 | -0.593852000 | -0.819031000 |
| H  | 4.222524000  | 0.640362000  | 0.287899000  | C | -5.568047000 | 0.508579000  | 0.946674000  |
| C  | 3.265315000  | -0.717999000 | -1.225386000 | C | -4.726254000 | -1.385913000 | -0.274002000 |
| H  | 3.429950000  | -0.202668000 | -2.161034000 | C | -3.644121000 | 0.753127000  | -0.474224000 |
| C  | 2.624975000  | -1.968580000 | -1.058083000 | C | -4.563327000 | 1.302268000  | 0.405972000  |
| P  | 1.154979000  | 1.746235000  | -0.233423000 | C | -5.648634000 | -0.833587000 | 0.605620000  |
| P  | 0.308149000  | -0.419898000 | 2.131980000  | H | -4.787747000 | -2.437668000 | -0.539737000 |
| H  | 0.706072000  | -1.398684000 | 3.062398000  | H | -2.858824000 | 1.374630000  | -0.899816000 |
| H  | -1.081239000 | -0.659478000 | 2.082796000  | H | -4.497849000 | 2.352978000  | 0.669404000  |
| H  | 0.334763000  | 0.725534000  | 2.949085000  | H | -6.431365000 | -1.456733000 | 1.026036000  |
| F  | -0.005427000 | 2.262452000  | -1.176444000 | H | -6.288271000 | 0.938537000  | 1.635282000  |
| F  | 0.875048000  | 2.740031000  | 0.966510000  |   |              |              |              |
